# Supplementary material for: Serum Calretinin and Genetic Variability as a Prognostic and Predictive Factor in Malignant Mesothelioma
Source: MDPI journal article supplement (doi:10.3390/ijms25010190), 2023-12-22
Supplement: s1 [file s1]

## Supplementary Materials

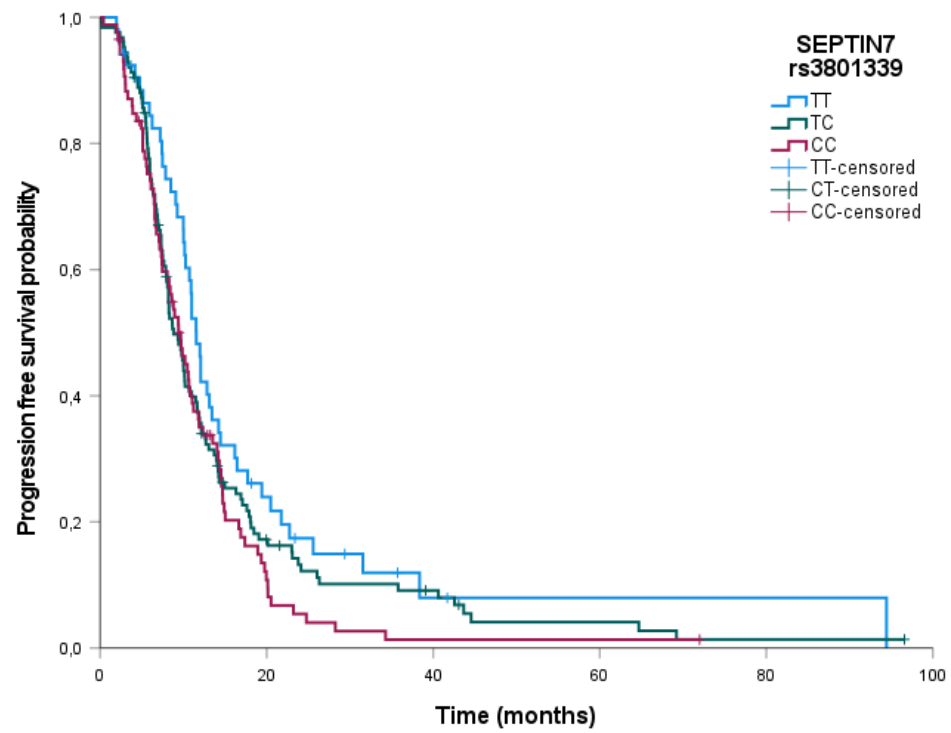

**Figure S1.** Association of *SEPTIN7* rs3801339 with progression free survival from diagnosis in malignant mesothelioma patients.

**Table S1.** Genotype frequencies of investigated single nucleotide polymorphisms.

| Gene    | SNP        | Nucleotide or amino acid change | Genotype | N (%)      | VAF   | pHWE  |
|---------|------------|---------------------------------|----------|------------|-------|-------|
| CALB2   | rs1862818  | c.-828C>T                       | CC       | 132 (49.8) | 0.296 | 0.826 |
|         |            |                                 | CT       | 109 (41.1) |       |       |
|         |            |                                 | TT       | 24 (9.1)   |       |       |
| CALB2   | rs889704   | c.-634C>A                       | CC       | 203 (76.6) | 0.123 | 0.574 |
|         |            |                                 | CA       | 59 (22.3)  |       |       |
|         |            |                                 | AA       | 3 (1.1)    |       |       |
| CALB2   | rs8063760  | c.*138T>C                       | CC       | 162 (61.1) | 0.223 | 0.508 |
|         |            |                                 | CT       | 88 (33.2)  |       |       |
|         |            |                                 | TT       | 15 (5.7)   |       |       |
| E2F2    | rs2075995  | c.678C>A, p.Gln226His           | CC       | 68 (25.7)  | 0.492 | 0.948 |
|         |            |                                 | CA       | 133 (50.2) |       |       |
|         |            |                                 | AA       | 64 (24.2)  |       |       |
| MIR335  | rs3807348  | g.130496266G>A                  | GG       | 67 (25.3)  | 0.504 | 0.668 |
|         |            |                                 | GA       | 129 (48.7) |       |       |
|         |            |                                 | AA       | 69 (26.0)  |       |       |
| NRF1    | rs13241028 | c.*1321T>C                      | TT       | 161 (60.8) | 0.219 | 0.803 |
|         |            |                                 | TC       | 92 (34.7)  |       |       |
|         |            |                                 | CC       | 12 (4.5)   |       |       |
| SEPTIN7 | rs3801339  | c.1168-4451T>C                  | TT       | 53 (20.0)  | 0.562 | 0.579 |
|         |            |                                 | TC       | 126 (47.5) |       |       |
|         |            |                                 | CC       | 86 (32.5)  |       |       |

HWE, Hardy–Weinberg equilibrium, SNP, single-nucleotide polymorphism, VAF, variant allele frequency

**Table S2.** Association of serum calretinin concentration with disease control rate, progression-free (PFS) and overall survival (OS) from the beginning of chemotherapy in MM patients treated with cisplatin-based chemotherapy: adjustment for clinical parameters.

| Calretinin concentration         | Disease control rate        |                   | PFS                         |                   | OS                          |                   |
|----------------------------------|-----------------------------|-------------------|-----------------------------|-------------------|-----------------------------|-------------------|
|                                  | OR (95% CI) <sub>adj1</sub> | P <sub>adj1</sub> | HR (95% CI) <sub>adj2</sub> | P <sub>adj2</sub> | HR (95% CI) <sub>adj3</sub> | P <sub>adj3</sub> |
| Serum concentration (ng/ml)      | 1.95 (1.23-3.10)            | 0.004             | 1.14 (0.93-1.39)            | 0.206             | 1.10 (0.89-1.37)            | 0.378             |
| <0.51 ng/ml, N (%) <sup>*</sup>  | Reference                   |                   | Reference                   |                   | Reference                   |                   |
| >0.51 ng/ml, N (%) <sup>*</sup>  | 2.49 (0.68-9.07)            | 0.168             | 1.08 (0.71-1.66)            | 0.709             | 0.95 (0.58-1.58)            | 0.852             |
| <0.89 ng/ml, N (%) <sup>**</sup> | Reference                   |                   | Reference                   |                   | Reference                   |                   |
| >0.89 ng/ml, N (%) <sup>**</sup> | 5.10 (1.36-19.10)           | 0.016             | 1.90 (1.20-3.00)            | 0.006             | 1.75 (1.00-3.03)            | 0.049             |

<sup>\*</sup>based on median calretinin concentration; <sup>\*\*</sup>based on cutoff value determined in ROC curve analysis

Adj1: adjusted for CRP in chemotherapy type; Adj2: adjusted for asbestos exposure, smoking, weight loss, CRP and histological type; Adj3: adjusted for smoking, CRP and histological type

**Table S3.** Association of selected polymorphisms with progression-free (PFS) and overall survival (OS) from the beginning of chemotherapy in MM patients treated with cisplatin-based chemotherapy.

| SNP                       | Genotype | PFS              |                  |       |                             |                   | OS               |                  |       |                             |                   |
|---------------------------|----------|------------------|------------------|-------|-----------------------------|-------------------|------------------|------------------|-------|-----------------------------|-------------------|
|                           |          | Median (25%-75%) | HR (95% CI)      | P     | HR (95% CI) <sub>adj1</sub> | P <sub>adj1</sub> | Median (25%-75%) | HR (95% CI)      | P     | HR (95% CI) <sub>adj2</sub> | P <sub>adj2</sub> |
| <i>CALB2</i><br>rs1862818 | CC       | 7.8 (5.2-12.7)   | Reference        |       | Reference                   |                   | 16.0 (8.7-26.5)  | Reference        |       | Reference                   |                   |
|                           | CT       | 7.9 (5.6-13.8)   | 0.86 (0.65-1.15) | 0.316 | 0.90 (0.65-1.24)            | 0.512             | 19.2 (10.6-32.5) | 0.75 (0.54-1.03) | 0.078 | 0.78 (0.55-1.09)            | 0.144             |
|                           | TT       | 9.1 (5.4-18.5)   | 0.80 (0.51-1.27) | 0.350 | 0.74 (0.45-1.22)            | 0.235             | 22.1 (10.6-26.7) | 0.80 (0.48-1.34) | 0.400 | 0.85 (0.50-1.44)            | 0.538             |
|                           | CT+TT    | 8.9 (5.5-14.1)   | 0.85 (0.65-1.11) | 0.241 | 0.86 (0.63-1.16)            | 0.318             | 20.5 (10.6-29.8) | 0.76 (0.56-1.03) | 0.075 | 0.79 (0.57-1.09)            | 0.149             |
| <i>CALB2</i><br>rs889704  | CC       | 8.5 (5.4-14.1)   | Reference        |       | Reference                   |                   | 18.3 (9.9-28.7)  | Reference        |       | Reference                   |                   |
|                           | CA       | 7.7 (5.1-10.5)   | 1.22 (0.88-1.70) | 0.231 | 1.12 (0.77-1.61)            | 0.557             | 16.0 (8.7-28.4)  | 1.19 (0.81-1.74) | 0.372 | 1.22 (0.83-1.80)            | 0.320             |
|                           | AA       | 6.4 (5.5-*)      | 1.51 (0.37-6.15) | 0.563 | 2.29 (0.56-9.43)            | 0.251             | 14.0 (6.8-14.0)  | 2.29 (0.56-9.35) | 0.248 | 4.49 (1.08-18.68)           | 0.039             |
|                           | CA+AA    | 7.7 (5.2-10.5)   | 1.23 (0.89-1.70) | 0.206 | 1.14 (0.80-1.64)            | 0.461             | 15.6 (8.7-28.4)  | 1.22 (0.84-1.77) | 0.294 | 1.27 (0.87-1.86)            | 0.219             |
| <i>CALB2</i><br>rs8063760 | CC       | 8.6 (5.2-15.0)   | Reference        |       | Reference                   |                   | 18.2 (9.4-26.8)  | Reference        |       | Reference                   |                   |
|                           | CT       | 7.9 (5.3-13.0)   | 1.01 (0.75-1.34) | 0.960 | 1.17 (0.85-1.60)            | 0.346             | 18.5 (10.1-30.2) | 0.86 (0.62-1.19) | 0.356 | 0.93 (0.65-1.32)            | 0.681             |
|                           | TT       | 6.7 (4.8-9.5)    | 1.57 (0.90-2.74) | 0.111 | 1.12 (0.60-2.07)            | 0.723             | 12.0 (6.8-21.1)  | 1.71 (0.94-3.12) | 0.080 | 1.47 (0.80-2.71)            | 0.212             |
|                           | CT+TT    | 7.8 (5.3-11.9)   | 1.07 (0.81-1.41) | 0.633 | 1.16 (0.86-1.56)            | 0.338             | 18.1 (9.9-29.6)  | 0.94 (0.69-1.28) | 0.704 | 1.01 (0.73-1.40)            | 0.960             |
| <i>E2F2</i><br>rs2075995  | CC       | 7.8 (5.3-13.6)   | Reference        |       | Reference                   |                   | 14.9 (9.1-23.6)  | Reference        |       | Reference                   |                   |
|                           | CA       | 8.6 (5.4-13.9)   | 0.83 (0.60-1.15) | 0.263 | 1.03 (0.71-1.48)            | 0.895             | 19.2 (9.5-29.7)  | 0.71 (0.50-1.02) | 0.063 | 0.90 (0.60-1.35)            | 0.626             |
|                           | AA       | 8.5 (5.3-13.8)   | 0.90 (0.62-1.31) | 0.576 | 1.07 (0.70-1.64)            | 0.746             | 18.3 (10.1-28.4) | 0.78 (0.51-1.18) | 0.244 | 1.05 (0.66-1.66)            | 0.848             |
|                           | CA+AA    | 8.6 (5.3-13.9)   | 0.85 (0.63-1.16) | 0.307 | 1.04 (0.74-1.47)            | 0.823             | 18.5 (9.8-29.6)  | 0.73 (0.52-1.03) | 0.071 | 0.95 (0.65-1.39)            | 0.786             |
|                           | GG       | 8.6 (5.3-14.1)   | Reference        |       | Reference                   |                   | 15.6 (8.7-23.9)  | Reference        |       | Reference                   |                   |

|                             |       |                |                  |       |                  |       |                  |                  |       |                  |       |
|-----------------------------|-------|----------------|------------------|-------|------------------|-------|------------------|------------------|-------|------------------|-------|
| <i>MIR335</i><br>rs3807348  | GA    | 8.5 (6.0-13.9) | 0.99 (0.71-1.37) | 0.937 | 1.24 (0.84-1.81) | 0.275 | 18.3 (10.1-29.7) | 0.81 (0.56-1.18) | 0.278 | 0.71 (0.48-1.06) | 0.096 |
|                             | AA    | 6.9 (4.6-11.7) | 1.24 (0.85-1.80) | 0.273 | 1.47 (0.95-2.27) | 0.085 | 16.0 (8.7-26.7)  | 1.07 (0.71-1.62) | 0.741 | 0.96 (0.62-1.50) | 0.874 |
|                             | GA+AA | 7.9 (5.4-13.1) | 1.06 (0.78-1.45) | 0.716 | 1.30 (0.90-1.88) | 0.156 | 18.2 (9.7-28.7)  | 0.89 (0.63-1.26) | 0.524 | 0.79 (0.54-1.15) | 0.216 |
| <i>NRF1</i><br>rs13241028   | TT    | 9.1 (5.6-13.8) | Reference        |       | Reference        |       | 18 (9.9-25.4)    | Reference        |       | Reference        |       |
|                             | TC    | 7.0 (4.4-13.0) | 1.10 (0.83-1.47) | 0.500 | 1.24 (0.90-1.70) | 0.189 | 18.3 (8.3-35.8)  | 0.90 (0.65-1.24) | 0.508 | 1.00 (0.71-1.40) | 0.991 |
|                             | CC    | 9.2 (4.8-31.3) | 0.81 (0.42-1.55) | 0.521 | 0.68 (0.27-1.74) | 0.422 | 28.8 (8.7-*)     | 0.51 (0.22-1.16) | 0.110 | 0.69 (0.28-1.71) | 0.421 |
|                             | TC+CC | 7.1 (4.4-13.0) | 1.06 (0.80-1.40) | 0.684 | 1.19 (0.87-1.62) | 0.289 | 18.5 (8.7-35.8)  | 0.84 (0.62-1.15) | 0.272 | 0.96 (0.69-1.34) | 0.829 |
| <i>SEPTIN7</i><br>rs3801339 | TT    | 9.2 (6.4-12.8) | Reference        |       | Reference        |       | 18.3 (9.1-22.7)  | Reference        |       | Reference        |       |
|                             | TC    | 7.7 (5.2-14.7) | 1.02 (0.72-1.46) | 0.896 | 0.89 (0.60-1.33) | 0.571 | 15.0 (9.5-28.7)  | 0.82 (0.56-1.21) | 0.325 | 0.88 (0.59-1.32) | 0.533 |
|                             | CC    | 7.6 (4.2-13.6) | 1.20 (0.82-1.77) | 0.343 | 1.34 (0.88-2.04) | 0.167 | 21.8 (9.9-29.7)  | 0.69 (0.45-1.06) | 0.092 | 0.86 (0.55-1.35) | 0.517 |
|                             | TC+CC | 7.7 (5.2-13.9) | 1.09 (0.78-1.52) | 0.619 | 1.04 (0.72-1.51) | 0.828 | 18.1 (9.7-29.6)  | 0.77 (0.54-1.11) | 0.160 | 0.87 (0.60-1.28) | 0.485 |

Adj1: adjusted for asbestos exposure, smoking, weight loss, CRP and histological type; Adj2: adjusted for smoking, CRP and histological type  
 \*not yet reached

CI, confidence interval, HR, hazard ratio, OS, overall survival, PFS, progression-free survival, SNP, single nucleotide polymorphism
